# Supplementary material
Source: HighWire-hosted journal article supplement (https://bmjopenquality.bmj.com/content/12/4/e002432)
Supplement: inline-supplementary-material-1 [file inline-supplementary-material-1.pdf]

Dear Society Member,

Thank you for your interest in our survey which considers the very important issue of diversity and inclusion within our society. We hope that you will feel able to participate freely, safe in the knowledge that the survey is both voluntary and anonymous.

Sharing your feedback should take between 5 to 10 minutes of your time. You will see a few open text questions - we encourage you to share your experience, however if you prefer not to do so, please just write Nil in the relevant box instead.

Thank you for your support by completing the survey.

### Demographics

*This section of the survey asks for your responses to the standard NHS equality and diversity survey. We intend to compare the aggregated responses of the British Hip Society to wider NHS data to understand existing levels of demographic diversity and identify where improvements are necessary.*

*No individuals will be identifiable in any reporting.*

**1. What year were you born? (to allow us to understand age diversity within the membership)**

**2. What is your ethnic group?**

*Please select **one** of the below which best describes your ethnicity*

Asian – Bangladeshi

Asian – Chinese

Asian – Indian

Asian – Pakistani

Asian – Other

Black – African

Black – Caribbean

Black – Other

Mixed – White / Asian

Mixed – White / Black African

Mixed – White / Black Caribbean

Mixed – Other

White – British Isles origin

White – European origin

White – Travelling Community

White – Other

Other – Arab

Other – Please write in:

**3. Do you have a disability as defined by the equality act 2010**

No

Yes

Prefer not to say

**4. How would you describe your gender?**

Please select **one** of the below

Female

Male

Prefer to self-describe: please write in

Prefer not to say

**5. What is your legal marital or civil partnership status?**

Divorced

Formerly in a registered civil partnership which is now dissolved

In a registered civil partnership

Married

Never married and never registered a civil partnership

Separated, but still in a registered civil partnership

Separated, but still legally married

Surviving partner from a registered civil partnership

Widowed

Prefer not to say

**6. What is your religion?**

Please select **one** of the below

Buddhist

Christian (including all denominations)

Hindu

Jewish

Muslim

None

Sikh

Other: please write in

**7. How would you describe your sexual orientation?**

Please select **one** of the below

Bisexual

Do not know

Gay or Lesbian

Heterosexual or Straight

Prefer to self-describe: please write in

Prefer not to say

Career Experience

*This section of the survey aims to understand if you have experienced any barriers to progressing within the Hip subspeciality of Trauma & Orthopaedics.*

**8. What position do you hold currently?**

Please select **one** of the below

Trainee

Training Interface Group (TIG) Fellowship

Post CCT Fellow

Consultant

Non-Consultant Specialty Surgeon

Scientist

Allied Health Professional

**Have you personally experienced any barriers relating to equality or diversity in your progression within the Hip subspecialty of Trauma & Orthopaedics (T&O) within the past 5 years?**

9. No, I have experienced no barriers to my progression relating to equality or diversity within T&O within the past 5 years
10. Yes, I have experienced barriers related to age within the last 5 years
11. Yes, I have experienced barriers related to gender within the last 5 years
12. Yes, I have experienced barriers related to language within the last 5 years
13. Yes, I have experienced barriers related to race within the last 5 years
14. Yes, I have experienced barriers related to religion within the last 5 years
15. Yes, I have experienced barriers related to social connections within the last 5 years
16. Yes, I have experienced barriers related to training access within the last 5 years
17. Yes, I have experienced barriers related to workplace culture within the last 5 years
18. Yes, I have experienced other barriers within the last 5 years

**19. Would you like to elaborate on any barriers to progression you have experienced within the Hip subspecialty of Trauma & Orthopaedics?**

Free text field

**Do you believe there are any barriers relating to equality or diversity to your further progression within the Hip subspecialty of Trauma & Orthopaedics?**

20. No, I perceive no further barriers to my progression relating to equality or diversity
21. Yes, I perceive there are barriers related to age
22. Yes, I perceive there are barriers related to gender
23. Yes, I perceive there are barriers related to language
24. Yes, I perceive there are barriers related to race
25. Yes, I perceive there are barriers related to religion
26. Yes, I perceive there are barriers related to social connections
27. Yes, I perceive there are barriers related to training access
28. Yes, I perceive there are barriers related to workplace culture
29. Yes, I perceive there are other barriers: please write in:

**30. Would you like to elaborate on your perception of barriers to further progression within the Hip subspecialty of Trauma & Orthopaedics?**

Free text field

Perception of the British Hip Society

*This section of the survey aims to understand your current perception of the British Hip Survey, relating to its progress in developing a diverse and inclusive workplace culture.*

- 31. How would you rate the British Hip Society on its commitment to developing an environment where people are encouraged to contribute, innovate and lead regardless of gender, ethnicity, sexual orientation or physical disability?**

|      |               |         |               |        |
|------|---------------|---------|---------------|--------|
| Weak | Below average | Average | Above Average | Strong |
|------|---------------|---------|---------------|--------|

- 32. How would you rate the British Hip Society on its progress towards to developing an environment where people are encouraged to contribute, innovate and lead regardless of gender, ethnicity, sexual orientation or physical disability?**

|      |               |         |               |           |
|------|---------------|---------|---------------|-----------|
| Poor | Below average | Average | Above Average | Excellent |
|------|---------------|---------|---------------|-----------|

**33. How would you rate the British Hip Society on its communication with members?**

|      |               |         |               |           |
|------|---------------|---------|---------------|-----------|
| Poor | Below average | Average | Above Average | Excellent |
|------|---------------|---------|---------------|-----------|

**34. How would you rate the British Hip Society on encouraging wider social engagement between members?**

|      |               |         |               |           |
|------|---------------|---------|---------------|-----------|
| Poor | Below average | Average | Above Average | Excellent |
|------|---------------|---------|---------------|-----------|

**35. Have you ever felt intentionally excluded from social conversations with British Hip Society colleagues (i.e. you were prevented from participating in the conversation)?**

Free text

**36. Have you ever felt unintentionally excluded from social conversations with British Hip Society colleagues (i.e. you were included in the conversation but unable to participate)?**

Free text

**37. What from your perspective would encourage greater social interaction and inclusion among British Hip Society members?**

Free text

**38. Have you ever felt intentionally excluded from professional interaction with British Hip Society colleagues (i.e. you were prevented from participating in the conversation)?**

Free text

**39. Have you ever felt unintentionally excluded from professional interaction with British Hip Society colleagues (i.e. you were included in the conversation but unable to participate)?**

Free text

**40. What from your perspective would encourage greater professional interaction and inclusion among British Hip Society members?**

Free text

Thank you for your responses to this questionnaire. Information will be collated anonymously with other responses by an independent research agency to produce data to assist our progress towards an inclusive and diverse workplace.
